# Supplementary material for: High electrocatalytic activity of carbon-supported Pd@PdO NPs catalysts prepared by a HaNPV virions template
Source: Royal Society of Chemistry journal article supplement (doi:10.1039/c6ra14283d), 2016-01-01
Supplement: c6ra14283d1.pdf [file c6ra14283d1.pdf]

## Supplementary Information

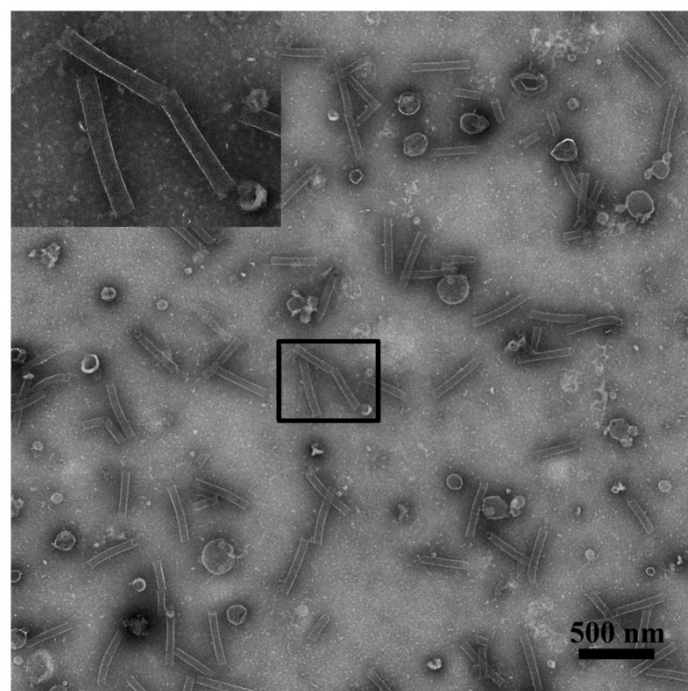

**Figure S1.** TEM images of the HaNPV virions (without Pd), Inset: high-magnification TEM image of rectangular area.

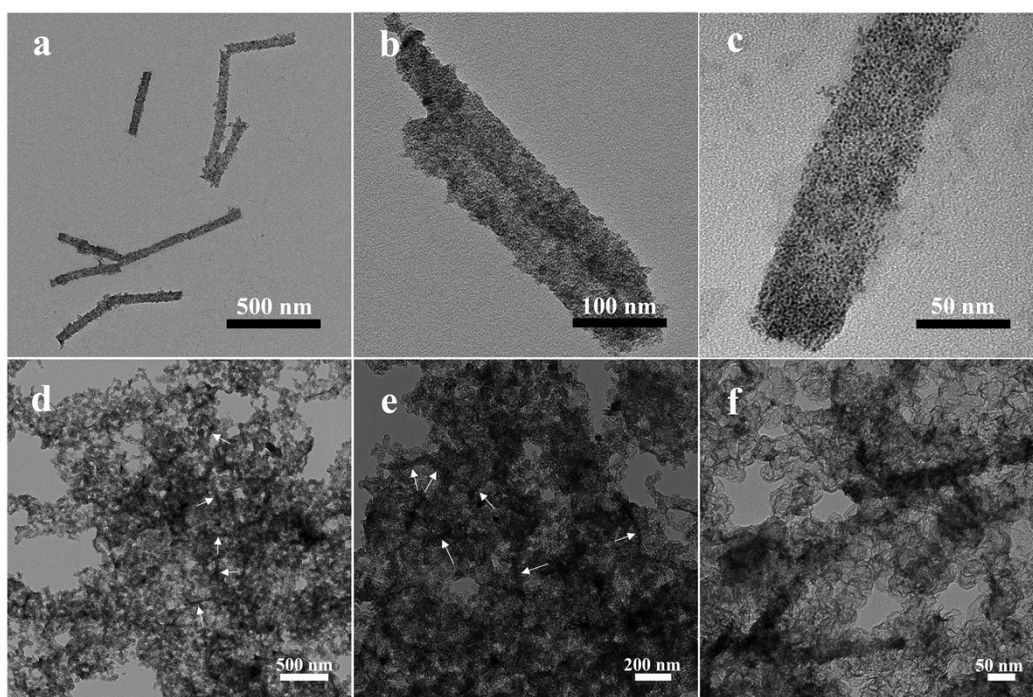

**Figure S2.** TEM images of the HaNPV capsids covered by metal nanoparticles at different magnifications (a, b and c) and obtained Pd@PdO NPs/C at different magnifications (d, e and f). The types-capsid covered structures are marked by white arrows.
